1        **Title: Attraction to pheromones in *Caenorhabditis elegans* can be reversed**  
2                                **through associative learning**

3 M. Dal Bello<sup>a,1</sup>, A. Pérez-Escudero<sup>a\*</sup>, F. C. Schroeder<sup>b</sup>, J. Gore<sup>a,1</sup>

4 **Affiliations:**

5 <sup>a</sup>Physics of Living Systems Group, Department of Physics, Massachusetts Institute of Technology,  
6 02139 Cambridge, Massachusetts, United States.

7 <sup>b</sup>Boyce Thompson Institute and Department of Chemistry and Chemical Biology, Cornell  
8 University, 14853 Ithaca, New York, United States.

9 \*Current address : Centre de Recherches sur la Cognition Animale (CRCA), Centre de Biologie  
10 Intégrative (CBI), Université de Toulouse ; CNRS, UPS, France.

11 **Abstract**

12 Despite the ubiquity and importance of chemical signaling, we have only limited insight about the  
13 role of learning in the response to pheromones. Here, we demonstrate that responses to pheromones  
14 can be reprogrammed through associative learning. In particular, we show that attraction to  
15 ascaroside pheromones in the model nematode *Caenorhabditis elegans* can be reversed by training  
16 the animals to associate either a pheromone blend or single synthetic ascarosides with the lack of  
17 food. This behavioral plasticity alters worm preference for pheromones following consumption of a  
18 food patch, possibly improving foraging in natural environments. By bridging the gap between the  
19 current knowledge on the chemical language and the learning abilities of *C. elegans*, we provide  
20 insight on the possible links between learning and chemical signaling in animals.

21 **Keywords:** pheromones, associative learning, ascarosides, behavior, *Caenorhabditis elegans*,  
22 foraging

23 Chemical signals underlie the behavior of all organisms, from bacteria to humans. Although  
24 examples of chemical communication were known since the ancient Greeks, it is in 1959, after the  
25 discovery of the silk moth sex cue bombykol, that Karlson and Lüscher (1) introduced the term  
26 “pheromones”. Pheromones are molecules that are externally secreted by an organism and act by  
27 triggering a specific reaction, such as a stereotyped behavior and/or a developmental process, in  
28 another individual of the same species (1). Among other things, pheromones regulate mate selection,  
29 promote aggregation, and aid in locating food or avoiding predators; in many species, they  
30 constitute the basis for social interactions. Responses induced by pheromones are typically  
31 predictable and innate meaning that they do not require specific learning (2).

32 The nematode *Caenorhabditis elegans* has an extensive chemical language that relies on  
33 more than 150 different molecules belonging to the family of ascarosides (3). Since several signal  
34 transduction pathways are conserved among invertebrates, the study of pheromone signaling in *C.*  
35 *elegans* has greatly contributed to the understanding of intraspecific chemical communication. By  
36 signaling population density, ascaroside pheromones regulate worm development, entry into dauer  
37 (a developmentally arrested larval stage) (4–8) and the plasticity in the response to both attractive  
38 and repulsive compounds (9, 10). Ascarosides are also potent attractants for adult worms, some of  
39 them mainly drawing males, others hermaphrodites (11–16).

40 Attraction to ascarosides, in all instances, has been assumed to be innate (11–14, 16, 17).  
41 Nevertheless, *C. elegans* exhibits a high level of behavioral plasticity (18), being able to learn and  
42 remember environmental stimuli (smells, tastes, oxygen levels and temperature) that anticipate  
43 attractive or aversive signals (19–21). In particular, worms can learn to associate these stimuli with  
44 the presence of bacterial food, and the result of this learning exercise is that worms are attracted  
45 through chemotaxis to that particular stimulus (20).

46 Here we demonstrate that response to ascarosides is another case of associative learning.  
47 Attraction can indeed be turned into repulsion by training *C. elegans* to associate either a  
48 pheromone blend produced by worms or single synthetic ascarosides to the absence of food. We

49 also explore the possible ecological consequences of the observed behavioral plasticity in the  
50 response to pheromones, highlighting that changing preference for pheromones following bacterial  
51 food consumption may help the worms to forage more efficiently in their natural environment.

## 52 **Results**

53 We first asked what is the response of a *C. elegans* natural isolate (MY1) to the pheromone cocktail  
54 it produces, as this simulates what worms are exposed to in their natural environment (22). We  
55 found that a natural pheromone blend obtained by collecting and filtering the supernatant of a worm  
56 liquid culture (23, 24) is a potent attractant. In a standard chemotaxis assay (20, 25), the number of  
57 worms arriving to a spot containing the pheromone blend was more than twice the number arriving  
58 at a spot containing a control solvent (Fig. 1A). By contrast, the chemotaxis-defective mutant  
59 PR691 (26), which cannot detect chemicals, could not distinguish between the pheromone blend  
60 and a control solvent (Fig. 1A). The explanation that has been given to this observation in the past  
61 decade is that attraction of the worms to the pheromone blend is an innate response (11–14, 16, 17).

62         However, while growing, worms are simultaneously exposed to both bacteria and  
63 ascarosides, which are continuously secreted by the animals (27) (Fig. 1B). Hence, an alternative  
64 explanation to “innate attractive behavior” can be that worms are attracted to the pheromone blend  
65 because of the positive association with food that they learn to make during growth on the plate. If  
66 associative learning regulates *C. elegans* response to pheromones, this positive association could be  
67 reversed just by training the worms to associate the pheromone blend with starvation, as has been  
68 demonstrated for salt (Fig. 1C) (20). We would therefore expect that animals fed in the presence of  
69 pheromones are attracted to them, while worms starved in the presence of pheromones avoid them  
70 (Fig. 1D).

71         We tested this hypothesis in a learning experiment in which MY1 worms were trained for  
72 six hours to associate their pheromone blend with either a positive stimulus, bacterial food, or a  
73 negative one, starvation (Fig. 2A). We found that chemotaxis to the pheromone blend, which is  
74 strong when worms are trained with food and pheromones, is lost by starving worms in the presence

75 of pheromones (Fig. 2B, blue and yellow bars). Worms have learned to associate the pheromone  
76 blend with the absence of food and in response they have changed their behavior. This suggests that,  
77 in the search for food, worms may avoid regions with pheromones if they experienced starvation in  
78 the presence of pheromones.

79 To determine the worm response in the absence of information about pheromones, animals  
80 were also trained without pheromone blend, both with and without bacterial food (Fig. 2A).  
81 Preference for the pheromone blend is lost when worms are trained in a plate without food nor  
82 pheromone blend (Fig. 2B, red bar). We interpret this as meaning that six hours without any  
83 information on pheromones is enough to make worms “forget” the positive association between  
84 food and pheromones they acquired during growth.

85 In contrast, preference for the pheromone blend is not lost when worms are trained in a plate  
86 in which we added food but not the pheromone blend (Fig. 2B, turquoise bar). In this condition,  
87 animals, whose density in conditioning plates is high, are simultaneously exposed to the food,  
88 which we provided, and the pheromones, which they are excreting (10). Hence, they may still be  
89 learning to associate pheromones with food. If this is true, worms trained with just food would lose  
90 chemotaxis towards the pheromone blend only in a condition in which their density is low enough  
91 to prevent the pheromone concentration from building up during the conditioning period. Consistent  
92 with this hypothesis, the preference for the pheromone blend goes to zero when animals are trained  
93 with food at low density (Fig. 2B, purple bar). The fact that worms lose the positive association  
94 between food and pheromones they learned during growth provides further support that *C. elegans*  
95 attraction to pheromones is not just innate.

96 A possible concern is that our observation of associative learning can be explained if starved  
97 worms simply behave differently than fed worms, losing the preference for the pheromone blend.  
98 However, our experiments training the worms in the presence of food but without added  
99 pheromones at high or low worm density show that it is not only the feeding state of the worm that  
100 determines the response to the pheromone blend, since equally fed worms showed attraction at high

101 density and no preference at low density. This result further reinforces our hypothesis that learning  
102 can modify worm response to pheromones.

103 We next asked whether associative learning with pheromones is a general phenomenon in *C.*  
104 *elegans*. To address this question, worms of the lab strain N2 and of another natural isolate, MY14,  
105 were trained for six hours to associate the pheromone blend with either bacterial food or starvation.  
106 We found that associative learning occurs in both strains, regardless of the magnitude of the  
107 attraction of each strain to the pheromone blend (Fig. S1). In particular, chemotaxis to the  
108 pheromone blend is strongly reduced in N2 worms, which displays strong attraction, and reversed  
109 in MY14 worms, which instead shows only a slight attraction to the pheromone blend (Fig. 2C).  
110 Differences in the relative strengths of attraction and repulsion to pheromones between the  
111 laboratory strain N2 and most wild isolates have been shown to result from a mutation in the  
112 neuropeptide-Y receptor locus, *npr-1(13)*. These results argue that associative learning of  
113 pheromone signals is likely common among *C. elegans* strains.

114 The pheromone blend contains, in addition to a cocktail of ascarosides, other products of  
115 worm metabolism, compounds deriving from the decomposition of dead worms and bacteria, and  
116 perhaps other unknown substances. To test whether altered responses to ascaroside pheromones  
117 underlie the observed learning, we repeated the experiment with pure synthetic ascarosides. We  
118 tested two synthetic molecules – *ascr#5* and the indole ascaroside *icas#9* – at the concentration at  
119 which each pheromone was attractive for MY1 strain (Fig. S2). *Ascr#5* is abundantly produced by  
120 *C. elegans* (15) and can act synergistically with other ascarosides promoting dauer formation (7).  
121 Unlike other dauer-inducing ascarosides, *ascr#5* is attractive for hermaphrodite N2 individuals (13).  
122 *Icas#9* exerts attraction on hermaphrodites, promoting aggregation (14), and suppresses exploratory  
123 behavior by slowing down worms while they are crawling on food (16).

124 To test for associative learning with pure *ascr#5* and *icas#9*, worms were trained to associate  
125 each ascaroside to either bacterial food or starvation and then assayed for chemotaxis to the  
126 ascaroside they were trained with (Fig. 3). Worms fed in the presence of either *ascr#5* or *icas#9*

127 prefer the ascaroside while this preference is reversed when worms are starved in the presence of  
128 either of the two ascarosides (Fig. 3). Analogously to the experiment with the pheromone blend, six  
129 hours without exposure to ascarosides are enough to lose the positive association between food and  
130 pheromones (Fig. 3). These results support our hypothesis that the worms were learning from the  
131 pheromones in the crude pheromone blend. We concluded that through associative learning, *C.*  
132 *elegans* is able to reverse its response to pheromones.

133 A potential confounding effect in the learning experiments could stem from the fact that  
134 worms during the training period are still producing and excreting pheromones, possibly interfering  
135 with the chemotaxis assay. To rule out this effect, we repeated the learning experiment with *ascr#5*  
136 using a *C. elegans* strain that doesn't produce pheromones but does sense them (14) (*daf-22*  
137 DR476). Similar to our results with the MY1 natural isolate, the *daf-22* worms go to *ascr#5* when  
138 trained to associate it with food, avoid *ascr#5* when trained to associate it with starvation, and lose  
139 their preference when trained in the absence of both *ascr#5* and food (Fig. S3). These findings  
140 further reinforce the fact that the modification in the worm behavior is due to pheromones.  
141 Interestingly, *daf-22* mutants go to *ascr#5* also when trained with just food (Fig. S3). Intuitively,  
142 this could contrast with the idea of worm response to pheromones being completely dependent on  
143 learning processes. This result suggests that part of the response of wild type *C. elegans* to  
144 pheromones is innate, but also that it can be modified by experience.

145 Associative learning underlies behavioral plasticity, i.e. the ability to tune behavior  
146 depending on the context. Several species exhibit behavioral plasticity as an adaptive response to  
147 different environments and as a vital strategy for dealing with environmental variation (28). *C.*  
148 *elegans*' optimal habitats, i.e. rotting plant stems, flower and fruits, are ephemeral and randomly  
149 distributed in space and time (29, 30). To survive, *C. elegans* has evolved a boom-and-bust life  
150 cycle, in which worms rapidly proliferate on bacteria-rich rotting material, and as soon as food is  
151 depleted they enter a non-feeding stage (dauer larva), which acts as a dispersal mechanism (30).  
152 However, bacterial food is heterogeneously distributed also at smaller spatial scales, i.e. on the

153 rotting material (30) and worms need to make decisions about how to explore it (31, 32), integrating  
154 information on food availability and pheromones (22). Pheromones concentrate around food  
155 patches that have been discovered, signaling either presence of food, if worms have just started to  
156 consume the food patch, or absence of food, if the food patch has been exploited. If worms were  
157 always attracted to pheromones then they would frequently end up in already spent patches. One  
158 possible mechanism to avoid this is to mark spent patches, and it is known that worms starved for  
159 long time periods secrete a pheromone profile that is different from fed worms (15, 27). Another  
160 mechanism that could act at shorter time scales is to change response to pheromones. We therefore  
161 hypothesize that behavioral plasticity depending on associative learning with pheromones may help  
162 worms to forage more efficiently.

163         We consider a possible scenario of worms exploiting food patches on a rotting fruit (Fig.  
164 4A). Initially, worms leaving a freshly depleted food patch are still likely to find a non-depleted  
165 food patch by following pheromone cues. However, after some time most patches will be depleted  
166 and worms will benefit from avoiding pheromone cues, since they are likely associated to exhausted  
167 food patches. This ultimately would result in a wider search for food (Fig. 4A). As an experimental  
168 test, we ran a modified chemotaxis assay in which worms encountered a food patch before choosing  
169 between the pheromone blend and the control solvent (Fig. 4B). Under our hypothesis, worm  
170 preference for either the pheromone blend or the control solvent should change over time, from the  
171 pheromone blend initially to the control solvent later. Consistent with this expectation, worms went  
172 to the pheromone blend for the first 3 hours of the experiment and then changed their preference, i.e.  
173 they avoided the pheromone blend, by the 5<sup>th</sup> hour (Fig. 4B). Although further investigation is  
174 needed to ascertain the impact of such processes in the wild, these results suggests that plasticity in  
175 the behavioral response to pheromones may be a further adaptation to exploit ephemeral food  
176 sources in a most efficient manner. Intriguingly, *C. elegans* individuals engage in a primitive form  
177 of farming by redistributing bacteria while foraging (31), and having navigational cues that help

178 avoid areas where nutrients, necessary for bacterial growth, have already been depleted may  
179 increase farming success.

## 180 **Discussion**

181 Since the discovery of the *dauer* pheromone about 20 years ago, chemical signaling in *C.*  
182 *elegans* has been under ever increasing scrutiny. However, no studies have examined the interplay  
183 between learning and chemical signaling in order to elucidate mechanisms underpinning worm  
184 behavior. Here we show that attraction to ascarosides is a learned response that depend on the  
185 capacity of *C. elegans* to associate environmental stimuli, in this case food, with pheromones.

186 Exploration of the link between pheromones and behavioral plasticity has recently given a  
187 new twist to the research on chemical signaling. In mice and bees, it has been shown that  
188 pheromones can influence behaviors that are not the primary target of their action. For example,  
189 several compounds present in the urine of male mice become attractive to females only after  
190 simultaneous exposure the pheromone darcin (33, 34). Similarly, exposure of young worker honey  
191 bees to pheromones can modulate learning of aversive associations and reward responsiveness (35,  
192 36). As such, pheromones have been proposed as regulators of behavioral plasticity, being the  
193 conditioning agent driving the response to chemical compounds with difference valence.

194 Moreover, chemical cues that regulate important behavioral responses but rely on learning  
195 have been discovered (37–40). To distinguish them from pheromones they are now identified as  
196 signature odors (38). For example, the chemical profile of ants displays species-specific molecules,  
197 but each colony produces different combinations and ratios of these molecules. Individuals of one  
198 colony learn to associate the particular mixture of odors with their nest-mates, helping to avoid  
199 conflicts with them while recognizing intruders from a different colony (37). Despite the existence  
200 of signature odors, this study, to our knowledge, is the first asking whether the response to  
201 molecules classified as pheromones can be modified by experience. Whether this applies to other  
202 animals than *C. elegans* has not been examined in detail, but these results should prompt more



203 studies investigating the extent to which some innate responses to pheromones can be  
204 reprogrammed through experience.

205 *C. elegans* is one of the best studied animals on earth, which enabled major advances in  
206 chemical signaling, behavior, and neuroscience. Our work, demonstrating that *C. elegans* is able to  
207 learn to associate pheromones with positive and negative stimuli, suggests that this highly tractable  
208 model system could be used to uncover the basis of learning-dependent phenotypic plasticity  
209 towards pheromones. Future studies will be required to determine what types of stimuli worms can  
210 learn to associate with pheromones, as well as the breadth of behavioral and other phenotypic  
211 responses that can be reprogrammed.

## 212 **Materials and Methods**

### 213 **Strains and culture conditions**

214 We used two *Caenorhabditis elegans* strains recently isolated from the wild, MY1 (Lingen,  
215 Germany) and MY14 (Mecklenbeck, Germany), as well as N2 (Bristol, UK), the chemotaxis-  
216 defective mutant PR691 and the *daf-22* strain DR476. All the strains have been obtained from the  
217 *Caenorhabditis* Genetic Centre (CGC). Worms were grown at 21-23 °C (room temperature) on  
218 nematode growth media (NGM) plates (100 mm) seeded with 200 µl of a saturated culture of *E.*  
219 *coli* OP50 bacteria (41). As for OP50 culture, a single colony was inoculated into 5ml of LB  
220 medium and grown for 24 h at 37 °C.

### 221 **Pheromones**

222 We obtained the crude pheromone blend by growing worms in liquid culture for 9 days (at room  
223 temperature and shaking at 250 rpm) (15). Individuals from one plate were washed and added to a  
224 1-liter flask with 150ml of S-medium inoculated with concentrated *E. coli* OP50 pellet made from 1  
225 liter of an overnight culture. Concentrated *E. coli* OP50 pellet was added any time the food supply  
226 was low, i.e. when the solution was no longer visibly cloudy (41). The pheromone blend was then  
227 obtained by collecting the supernatant and filter-sterilizing it twice. A new pheromone blend was

228 produced every 3 months. We used the pheromone blend produced by MY1 also for tests with N2  
229 and MY14 for two main reasons: to minimize variation among experiments and because the type  
230 and amount of ascarosides produced by these strains should be the same (16). Pure synthetic  
231 ascarosides (ascr#5 and icas#9) were obtained from the Schroeder lab and kept at -20°C in ethanol.  
232 Each time an experiment was performed, an aqueous solution at the desired molar concentration  
233 was prepared (10 µM for ascr#5 and 10 pM for icas#9). The control solvent for the pheromone  
234 blend is S-medium, while the control solvent for the pure ascarosides is an aqueous solution with  
235 the same amount of ethanol present in the ascaroside aqueous solution (14).

### 236 **Chemotaxis assay**

237 Chemotaxis assay has been performed in 60 mm NGM plates, in which worms are given the choice  
238 between pheromone (either 20 µl of the pheromone blend or 20 µl of a pure ascaroside in aqueous  
239 solution) and a control solvent (20 µl) (20, 25). The two spots are deployed ~3 cm apart from each  
240 other (Fig. S4A). Shortly before the start of the assay, 1 µl of 0.5 M sodium azide is added to both  
241 spots in order to anaesthetize the animals once they reach the spots. Animals, either naïve or trained,  
242 are placed equidistant from the two spots and left to wander on the assay plate for 1 hour at room  
243 temperature (Fig. S4A). The average number of worms in each experiment is indicated in the figure  
244 captions. The assay plates were then cooled at 4°C and the number of worms around each spot was  
245 counted using a lens. The chemotaxis index is then calculated as  $\frac{N_p - N_c}{N_p + N_c}$ , where  $N_p$  is the number of  
246 worms within 1 cm of the center of the pheromone spot, while  $N_c$  is the number of worms within 1  
247 cm of the center of the control spot. The number of independent experiments is indicated in the  
248 figure captions. For each experiment, we usually performed 10 replicated assays. The average  
249 number of worms used in each replicated assay across all experiments is ~ 50.

### 250 **Learning experiment**

251 Worms are grown until they become young adults in NGM plates seeded with 200 µl of saturated *E.*

252 *coli* OP50 bacteria. Then worms are washed off the plates with wash buffer (M9 + 0.1% triton),  
253 transferred to an Eppendorf tube and washed twice by spinning down the worms and replacing the  
254 supernatant with fresh wash buffer each time. After that, animals are transferred to conditioning  
255 plates where they are trained to associate pheromones (pheromone blend / pure ascaroside) either  
256 with a positive stimulus (food) or a negative one (starvation). To induce the positive association,  
257 worms trained on an NGM plate seeded with 200  $\mu$ l of a saturated culture of *E. coli* OP50 blended  
258 with 200  $\mu$ l of pheromone blend or aqueous solution of pure ascaroside (+ food + pheromone). To  
259 induce the negative association, worms are conditioned on an NGM plate seeded with 200  $\mu$ l of  
260 pheromone blend or aqueous solution of pure ascaroside (– food + pheromone). As controls, worms  
261 are also placed in conditioning plates with 3) nothing (– food – pheromone) and 4) only food (+  
262 food – pheromone). Conditioning plates are prepared ~16 hours before the training starts, so that  
263 bacteria can grow and form a lawn. In the case of pure ascarosides, the concentration of ascaroside  
264 that was added for the conditioning plate was higher than the concentration at which the worms  
265 were tested chemotaxis to compensate for the diffusion of the ascaroside throughout the agar in the  
266 conditioning plates. Ascr#5 was added at a concentration of 100  $\mu$ M onto conditioning plates, while  
267 icas#9 was added at a concentration of 1  $\mu$ M. Worms spent 6 hours on the conditioning plates at  
268 room temperature, after which they are assayed for pheromone chemotaxis.

#### 269 **Modified chemotaxis assay (choice after food)**

270 It is a chemotaxis assay performed on naïve worms that encounter a food patch before making the  
271 choice between the pheromone blend and the control solvent. We used 100 mm NGM plates in  
272 which we deployed 20  $\mu$ l of the pheromone blend, 20  $\mu$ l of control solvent and 15  $\mu$ l of a diluted  
273 OP50 *E. coli* culture at equal distance from each other (Fig. S4B). In the pheromone and control  
274 spots, 2  $\mu$ l of 0.5 M sodium azide was added in order to anaesthetize the animals once they reached  
275 the spots. Since the anesthetic action of sodium azide lasts for about 2 hours in this set-up, another  
276 1  $\mu$ l was added two hours after the beginning of the assay in both spots. Naïve animals were placed

277 close to the bacteria spot, so that they stop and consume that patch before chemotaxis towards the  
278 two cues. Worms are left to wander freely on the assay plate until the food is finished (5 hours). The  
279 number of worms around the two spots was counted every hour and the chemotaxis index was  
280 calculated based on the number of new worms that reached the two spots during each hour.

## 281 **Acknowledgments**

282 The authors would like to thank the members of the Gore lab for feedback on the manuscript and  
283 Ying K. Zhang for assistance with the synthesis of ascarosides. This work was supported by NIH  
284 and the Schmidt Foundation. APE is funded by EMBO Postdoctoral Fellowship Grant ALTF 818-  
285 2014 and Human Frontier Science Foundation Postdoctoral Fellowship Grant LT000537/2015.  
286 All *C. elegans* strains were provided by the CGC, which is funded by NIH Office of Research  
287 Infrastructure Programs (P40 OD010440).

## 288 **Footnotes**

289 <sup>1</sup>To whom the correspondence may be addressed. Email:

290 [dalbello@mit.edu](mailto:dalbello@mit.edu) or [gore@mit.edu](mailto:gore@mit.edu)

291 MDB, APE and JG conceived the study. MDB performed the experiments and analyzed the data.  
292 FCS contributed the synthetic pheromones. All authors wrote the manuscript.

293 The authors declare no competing interests.

## 294 **References**

- 295 1. P. Karlson, M. Lüscher, ‘Pheromones’: a New Term for a Class of Biologically Active  
296 Substances. *Nature*. **183**, 55–56 (1959).
- 297 2. T. D. Wyatt, *Pheromones and Animal Behavior: Chemical Signals and Signature Mixes*  
298 (Cambridge University Press, 2014).
- 299 3. A. H. Ludewig, F. C. Schroeder, Ascaroside signaling in *C. elegans*. *WormBook*, 1–22

- 300 (2013).
- 301 4. J. W. Golden, D. L. Riddle, A pheromone influences larval development in the nematode  
302 *Caenorhabditis elegans*. *Science*. **218**, 578–80 (1982).
- 303 5. J. W. Golden, D. L. Riddle, The *Caenorhabditis elegans* dauer larva: Developmental effects  
304 of pheromone, food, and temperature. *Dev. Biol.* **102**, 368–378 (1984).
- 305 6. P. Jeong *et al.*, Chemical structure and biological activity of the *Caenorhabditis elegans*  
306 dauer-inducing pheromone. *Nature*. **433**, 541–545 (2005).
- 307 7. R. A. Butcher, J. R. Ragains, E. Kim, J. Clardy, A potent dauer pheromone component in  
308 *Caenorhabditis elegans* that acts synergistically with other components. *Proc. Natl. Acad. Sci.*  
309 *U. S. A.* **105**, 14288–92 (2008).
- 310 8. R. A. Butcher, J. R. Ragains, J. Clardy, An indole-containing dauer pheromone component  
311 with unusual dauer inhibitory activity at higher concentrations. *Org. Lett.* **11**, 3100–3103  
312 (2009).
- 313 9. K. Yamada *et al.*, Olfactory plasticity is regulated by pheromonal signaling in *Caenorhabditis*  
314 *elegans*. *Science*. **329**, 1647–50 (2010).
- 315 10. N. Sakai *et al.*, A Sexually Conditioned Switch of Chemosensory Behavior in *C. elegans*.  
316 *PLoS One*. **8**, e68676 (2013).
- 317 11. J. M. Simon, P. W. Sternberg, Evidence of a mate-finding cue in the hermaphrodite  
318 nematode *Caenorhabditis elegans*. *Proc. Natl. Acad. Sci.* **99**, 1598–1603 (2002).
- 319 12. C. Pungaliya *et al.*, A shortcut to identifying small molecule signals that regulate behavior  
320 and development in *Caenorhabditis elegans*. *Proc. Natl. Acad. Sci. U. S. A.* **106**, 7708–7713  
321 (2009).
- 322 13. E. Z. Macosko *et al.*, A hub-and-spoke circuit drives pheromone attraction and social  
323 behaviour in *C. elegans*. *Nature*. **458**, 1171–1175 (2009).
- 324 14. J. Srinivasan *et al.*, A modular library of small molecule signals regulates social behaviors in  
325 *Caenorhabditis elegans*. *PLoS Biol.* **10**, 1–14 (2012).

- 326 15. S. H. Von Reuss *et al.*, Comparative metabolomics reveals biogenesis of ascarosides, a  
327 modular library of small-molecule signals in *C. elegans*. *J. Am. Chem. Soc.* **134**, 1817–1824  
328 (2012).
- 329 16. J. S. Greene *et al.*, Balancing selection shapes density-dependent foraging behaviour. *Nature*.  
330 **539**, 254–258 (2016).
- 331 17. J. Srinivasan *et al.*, A blend of small molecules regulates both mating and development in  
332 *Caenorhabditis elegans*. *Nature*. **454**, 1115–1118 (2008).
- 333 18. E. L. Ardiel, C. H. Rankin, An elegant mind: Learning and memory in *Caenorhabditis*  
334 *elegans*. *Learn. Mem.* **17**, 191–201 (2010).
- 335 19. C. I. Bargmann, H. R. Horvitz, Chemosensory neurons with overlapping functions direct  
336 chemotaxis to multiple chemicals in *C. elegans*. *Neuron*. **7**, 729–42 (1991).
- 337 20. S. Saeki, M. Yamamoto, Y. Iino, Plasticity of chemotaxis revealed by paired presentation of  
338 a chemoattractant and starvation in the nematode *Caenorhabditis elegans*. *J. Exp. Biol.* **204**,  
339 1757–64 (2001).
- 340 21. R. K. Hukema, S. Rademakers, G. Jansen, Gustatory plasticity in *C. elegans* involves  
341 integration of negative cues and NaCl taste mediated by serotonin, dopamine, and glutamate.  
342 *Learn. Mem.* **15**, 829–836 (2008).
- 343 22. A. S. Edison, *Caenorhabditis elegans* pheromones regulate multiple complex behaviors. *Curr.*  
344 *Opin. Neurobiol.* **19**, 378–388 (2009).
- 345 23. J. Q. White *et al.*, The Sensory Circuitry for Sexual Attraction in *C. elegans* Males. *Curr.*  
346 *Biol.* **17**, 1847–1857 (2007).
- 347 24. A. Choe *et al.*, Ascaroside signaling is widely conserved among nematodes. *Curr. Biol.* **22**,  
348 772–780 (2012).
- 349 25. C. I. Bargmann, H. R. Horvitz, Chemosensory neurons with overlapping functions direct  
350 chemotaxis to multiple chemicals in *C. elegans*. *Neuron*. **7**, 729–742 (1991).
- 351 26. C. I. Bargmann, E. Hartweg, H. R. Horvitz, Odorant-selective genes and neurons mediate

- 352 olfaction in *C. elegans*. *Cell*. **74**, 515–527 (1993).
- 353 27. F. Kaplan *et al.*, Ascaroside expression in *Caenorhabditis elegans* is strongly dependent on  
354 diet and developmental stage. *PLoS One*. **6**, e17804 (2011).
- 355 28. S. Stearns, The evolutionary significance of phenotypic plasticity. *Bioscience*. **39**, 436–445  
356 (1989).
- 357 29. L. Frézal, M. A. Félix, *C. elegans* outside the Petri dish. *Elife*. **2015**, 1–14 (2015).
- 358 30. H. Schulenburg, M. A. Félix, The natural biotic environment of *Caenorhabditis elegans*.  
359 *Genetics*. **206**, 55–86 (2017).
- 360 31. S. Thutupalli *et al.*, Farming and public goods production in *Caenorhabditis elegans*  
361 populations. *Proc. Natl. Acad. Sci.* **114**, 2289–2294 (2017).
- 362 32. A. J. Calhoun *et al.*, Neural Mechanisms for Evaluating Environmental Variability in  
363 *Caenorhabditis elegans*. *Neuron*. **86**, 428–441 (2015).
- 364 33. S. A. Roberts, A. J. Davidson, R. J. Beynon, J. L. Hurst, Female attraction to male scent and  
365 associative learning: The house mouse as a mammalian model. *Anim. Behav.* **97**, 313–321  
366 (2014).
- 367 34. E. Lanuza *et al.*, Sex pheromones are not always attractive: changes induced by learning and  
368 illness in mice. *Anim. Behav.* **97**, 265–272 (2014).
- 369 35. V. Vergoz, H. A. Schreurs, A. R. Mercer, Queen pheromone blocks aversive learning in  
370 young worker bees. *Science*. **317**, 384–6 (2007).
- 371 36. D. Baracchi, J. M. Devaud, P. D’Ettorre, M. Giurfa, Pheromones modulate reward  
372 responsiveness and non-associative learning in honey bees. *Sci. Rep.* **7**, 9875 (2017).
- 373 37. J. S. van Zweden, P. D’Ettorre, in *Insect Hydrocarbons: Biology, Biochemistry, and*  
374 *Chemical Ecology*, G. J. Blomquist, A.-G. Bagnères, Eds. (Cambridge University Press,  
375 Cambridge, 2010), pp. 222–243.
- 376 38. T. D. Wyatt, Pheromones and signature mixtures: Defining species-wide signals and variable  
377 cues for identity in both invertebrates and vertebrates. *J. Comp. Physiol. A Neuroethol.*

- 378            *Sensory, Neural, Behav. Physiol.* **196** (2010), pp. 685–700.
- 379    39.    V. J. Emery, N. D. Tsutsui, Differential Sharing of Chemical Cues by Social Parasites Versus  
380            Social Mutualists in a Three-Species Symbiosis. *J. Chem. Ecol.* **42**, 277–285 (2016).
- 381    40.    L. Sreng, B. Temime-Roussel, H. Wortham, C. Mourre, Chemical Identification of “Maternal  
382            Signature Odors” in Rat. *Chem. Senses.* **42**, 211–222 (2017).
- 383    41.    T. Stiernagle, Maintenance of *C. elegans*. *WormBook* (2006), doi:10.1895/wormbook.1.101.1.  
384  
385



386 **Figures**

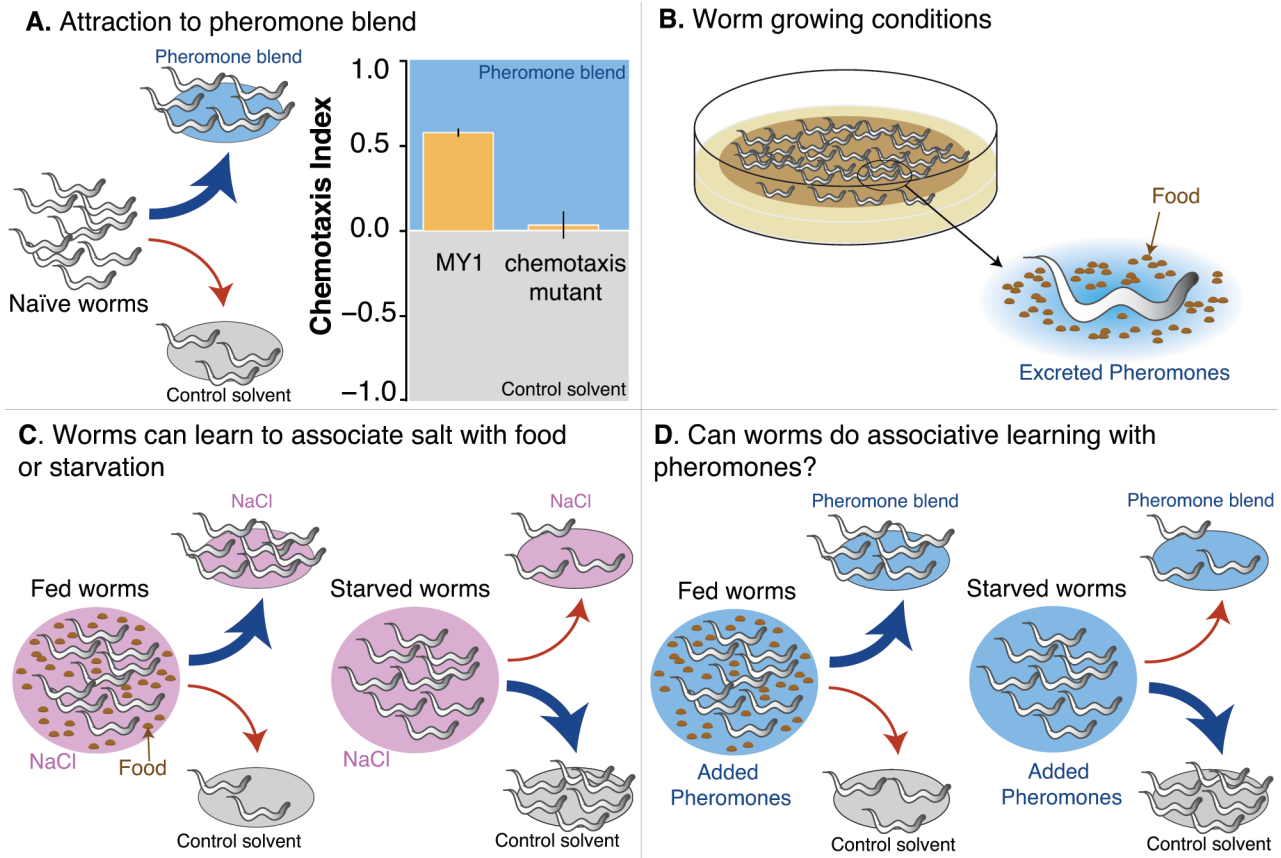

387

388 **Figure 1. Is *C. elegans* attraction to pheromones a case of associative learning?** **A.** Natural  
 389 isolate MY1 is attracted to a pheromone blend obtained from the supernatant of a MY1 liquid  
 390 culture. A chemotaxis mutant (PR691), instead, can't distinguish between the pheromone blend and  
 391 a control solvent. Attraction is measured with a chemotaxis assay, in which age-synchronized naïve  
 392 worms are given the choice between the pheromone blend and a control solvent. Chemotaxis index  
 393 (CI) is defined as  $(N_P - N_C) / (N_P + N_C)$ , where  $N_P$  and  $N_C$  are the number of worms at the pheromone  
 394 and control spot, respectively (mean CI  $\pm$  SEM, for MY1, n. experiments=4; for PR691, n.  
 395 experiments =1). **B.** The chemotaxis assay is performed on worms that grow at high density with  
 396 plenty of food (*E. coli* OP50), excreting and sensing pheromones. **C.** *C. elegans* can learn to  
 397 associate salt with positive or negative stimuli. Worms fed in the presence of salt (NaCl) are  
 398 attracted by it, while worms starved in the presence of salt avoid it (20). **D.** If associative learning  
 399 regulates *C. elegans* response to pheromones, attraction to the pheromone blend is due to the  
 400 positive association with food that the worms make during growth, and it can be reversed by  
 401 starving the worms in the presence of the pheromone blend.

402

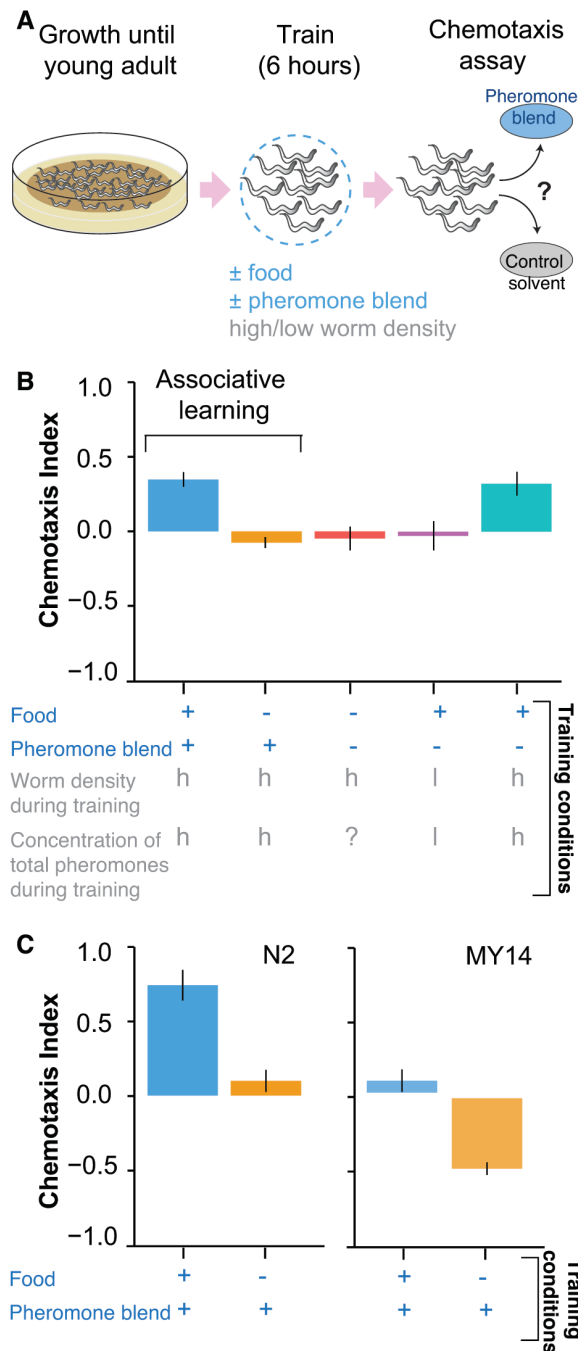

403

404 **Figure 2. Associative learning regulates *C. elegans* response to pheromone blend.** **A.** Worms  
 405 grow at high density and with plenty of food until young adult. Animals are then transferred to  
 406 conditioning plates, where they spend 6 hours. Worms are then assayed for chemotaxis to the  
 407 pheromone blend. **B.** The natural isolate MY1 is capable of associative learning with the  
 408 pheromone blend. Blue labels along the x axis indicate the training conditions; grey labels indicate  
 409 instead the density of worms (h, high or l, low) and the total pheromone concentration (added  
 410 pheromone blend + pheromones excreted by worms during the training period, h, high or l, low)  
 411 inside the conditioning plates. Chemotaxis index for each different training condition (worms at  
 412 high density): ‘+food+pheromone blend’, blue bar; ‘-food+pheromone blend’, yellow bar; ‘-food-  
 413 pheromone blend’, red bar; ‘+food-pheromone blend’, turquoise bar. Purple bar: ‘+food-  
 414 pheromone blend’ with worms at low density. Mean CI ± SEM, n. experiments= 4. **C.** Also the  
 415 strain N2 and MY14 are capable of associative learning with the pheromone blend. Chemotaxis  
 416 index for ‘+food+pheromone blend’ (blue bar), ‘-food+pheromone blend’ (yellow bar), worms at  
 417 high density (mean CI ± SEM, for N2, n. experiments=1; for MY14, n. experiments=2).

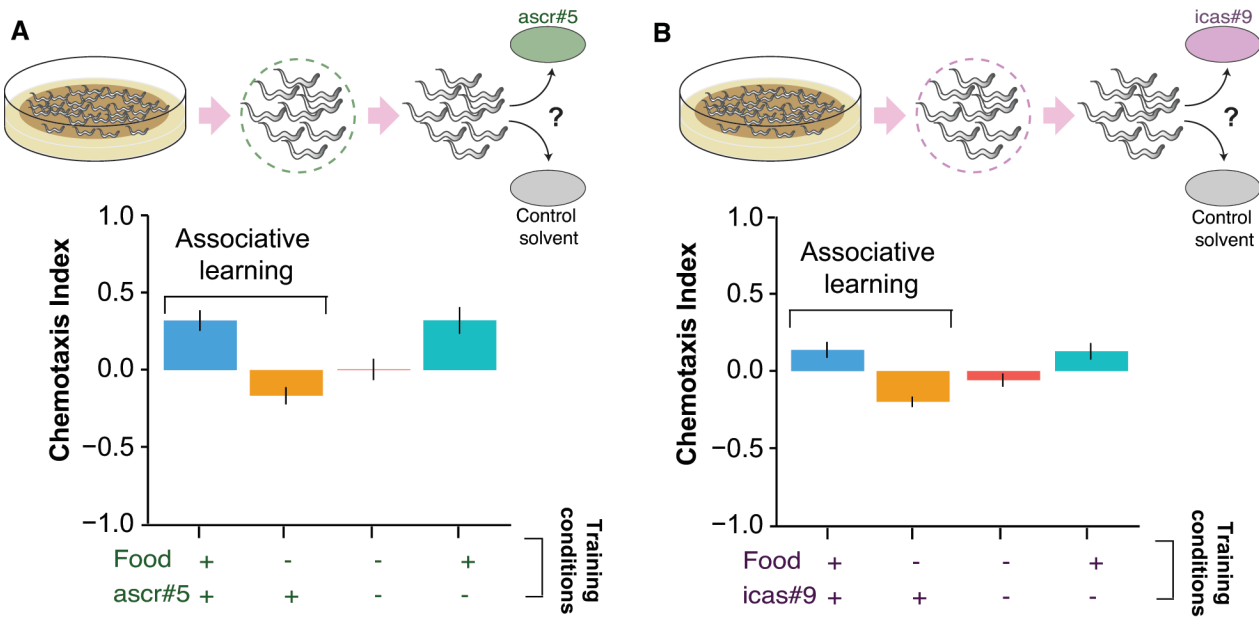

418

419 **Figure 3. Associative learning can reverse the MY1 response to pure ascarosides (panel A**  
 420 **ascr#5, panel B icas#9).** Worms grow at high density and with plenty of food until young adult.  
 421 Animals are then transferred to conditioning plates, where they spend 6 hours training with either  
 422 ascr#5 or icas#9. Worms are then assayed for chemotaxis to the ascaroside they were trained with.  
 423 Chemotaxis index (mean CI  $\pm$  SEM, for ascr#5: n. experiments =3; for icas#9: n. experiments =5)  
 424 for the different training conditions (indicated in green and violet along the x axis, all at high worm  
 425 density): ‘+ food + ascr#5 / icas#9’ (blue bars, positive association: food and ascarosides), ‘-food +  
 426 ascr#5 / icas#9’ (yellow bars, negative association: starvation and ascarosides), ‘- food - ascr#5 /  
 427 icas#9’ (red bars), ‘+ food - ascr#5 / icas#9’ (turquoise bars).  
 428

**A. Associative learning outside the petri dish**

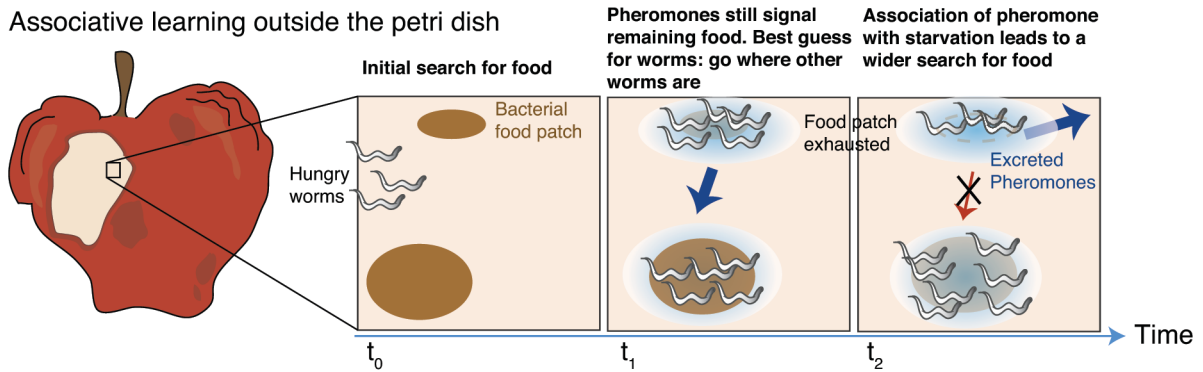

**B. Worms should change preference over time**

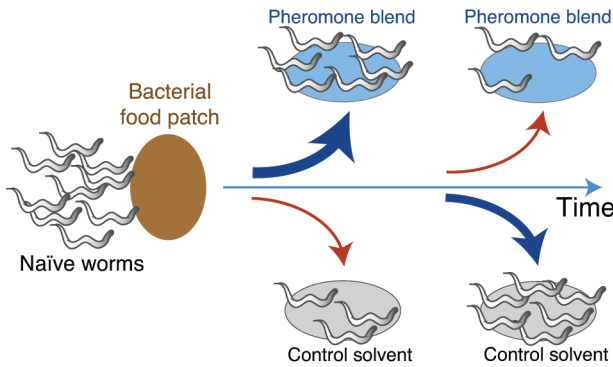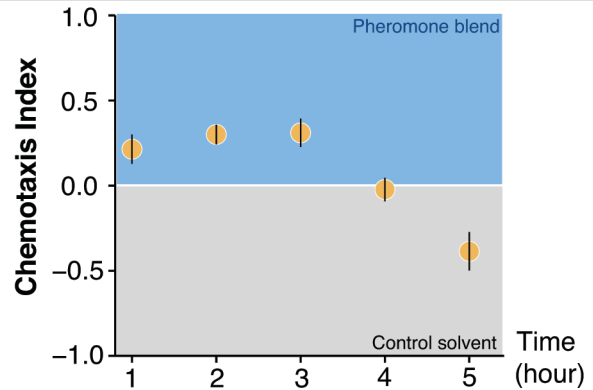

429

430 **Figure 4. Associative learning with pheromones may help worms to forage more efficiently.** **A.**  
 431 We consider a possible scenario of worms exploiting food patches on a rotting piece of fruit. During  
 432 the rotting process the bacterial patches could be exhausted at different times. Therefore, worms  
 433 leaving a freshly depleted food patch are still likely to find a non-depleted food patch by following  
 434 pheromone cues. However, when most patches become depleted, worms will benefit from avoiding  
 435 pheromone cues, which are likely to be associated to exhausted food patches. Changing preference  
 436 for pheromones in time would allow the worms to increase the chances to find unexploited food  
 437 patches. **B.** Under this hypothesis, the preference for either the pheromone blend or the control  
 438 solvent of naïve worms presented with a food patch should change over time, from the pheromone  
 439 blend initially to the control solvent later. In the plot, chemotaxis index calculated on the MY1  
 440 worms that, each hour, reach the two spots (mean CI  $\pm$  SEM, n. experiments = 1, n. plates = 25, n.  
 441 adult worms per plate  $\sim$  80).

442
